# Supplementary material for: A Novel Framework for Molecular Characterization of Atmospheric Organic Aerosol Based on Collision Cross Section and Mass-to-Charge Ratio
Source: Copernicus journal article supplement (doi:10.5194/acp-2016-481), 2016-06-29
Supplement: Supplementary file [file acp-2016-481-AC3-supplement.pdf]

**A Novel Framework for Molecular Characterization of Atmospherically Relevant Organic Compounds Based on Collision Cross Section and Mass-to-Charge Ratio**

X. Zhang<sup>1</sup>, J. E. Krechmer<sup>2,3</sup>, M. Groessl<sup>4</sup>, W. Xu<sup>1</sup>, S. Graf<sup>4</sup>, M. Cubison<sup>4</sup>,  
J. T. Jayne<sup>1</sup>, J.L. Jimenez<sup>2,3</sup>, D. R. Worsnop<sup>1</sup>, and M. R. Canagaratna<sup>1</sup>

<sup>1</sup> Center for Aerosol and Cloud Chemistry, Aerodyne Research Inc., Billerica, MA 01821, USA

<sup>2</sup> Department of Chemistry and Biochemistry, University of Colorado, Boulder, CO 80309, USA

<sup>3</sup> Cooperative Institute for Research in Environmental Sciences, Boulder, CO 80309, USA

<sup>4</sup> TOFWERK, CH-3600 Thun, Switzerland

*Correspondence to:* M. R. Canagaratna (mrcana@aerodyne.com)

1 **Abstract**

2 A new metric is introduced for representing the molecular signature of  
3 atmospherically relevant organic compounds, the collision cross section ( $\Omega$ ), a quantity  
4 that is related to the structure and geometry of molecules and is derived from ion mobility  
5 measurements. By combination with the mass-to-charge ratio ( $m/z$ ), a two-dimensional  
6  $\Omega - m/z$  space is developed to facilitate the comprehensive investigation of the complex  
7 organic mixtures. A unique distribution pattern of chemical classes, characterized by  
8 functional groups including amine, alcohol, carbonyl, carboxylic acid, ester, and organic  
9 sulfate, is developed on the 2-D  $\Omega - m/z$  space. Species of the same chemical class,  
10 despite variations in the molecular structures, tend to situate as a narrow band on the  
11 space and follow a trend line. **Reactions involving changes in functionalization and  
12 fragmentation can be represented by the directionalities along or across these trend lines,  
13 thus allowing for the interpretation of atmospheric transformation mechanisms of organic  
14 species.** The characteristics of trend lines for a variety of functionalities that are  
15 commonly present in the atmosphere can be predicted by the core model simulations,  
16 which provide a useful tool to identify the chemical class to which an unknown species  
17 belongs on the  $\Omega - m/z$  space. Within the band produced by each chemical class on the  
18 space, molecular structural assignment can be achieved by utilizing collision induced  
19 dissociation as well as by comparing the measured collision cross sections in the context  
20 of those obtained via molecular dynamics simulations.

21

22

23

24

25

26

27

## 28 1. Introduction

29 Organic species in the atmosphere — their chemical transformation, mass transport,  
30 and phase transitions — are essential for the interaction and coevolution of life and  
31 climate (Pöschl and Shiraiwa, 2015). Organic species are released into the atmosphere  
32 through biogenic processes and anthropogenic activities. Once in the atmosphere,  
33 organic species actively evolve via multiphase chemistry and gas-particle phase  
34 conversion. The complexity and dynamic behaviors of organic species have prevented  
35 our capability to accurately predict their levels, temporal and spatial variability, and  
36 oxidation dynamics associated with the formation and evolution of organic aerosols in the  
37 atmosphere.

38 Several two-dimensional frameworks have been developed in an effort to deconvolve  
39 the complexity of organic mixtures and visualize their atmospheric transformations. The  
40 Van Krevelen diagram, which cross plots the hydrogen-to-carbon atomic ratio (H:C) and  
41 the oxygen-to-carbon atomic ratio (O:C), has been widely used to represent the bulk  
42 elemental composition and the degree of oxygenation of organic aerosol (Heald et al.,  
43 2010). The average carbon oxidation state ( $\overline{OS}_C$ ), a quantity that necessarily increases  
44 upon oxidation, can be estimated from the elemental ratios (Kroll et al., 2011). When  
45 coupled with carbon number ( $n_C$ ), it provides constraints on the chemical composition of  
46 organic mixture and defines key classes of atmospheric processes based on the unique  
47 trajectory of the evolving organic chemical composition on the  $\overline{OS}_C - n_C$  space. The  
48 degree of oxidation has also been combined with the volatility (expressed as the effective  
49 saturation concentration,  $C^*$ ), forming a 2-D volatility basis set to describe the coupled  
50 aging and phase partitioning of organic aerosol (Donahue et al., 2012). These three  
51 spaces are designed to represent fundamental properties of the organic mixtures and  
52 provide insight into their chemical evolution in the atmosphere. Organic species span  
53 large varieties in the physicochemical properties. Species of similar volatility or  
54 elemental composition can differ vastly in structures and functionalities. One weakness of  
55 these frameworks is that they do not provide information on the organic components at  
56 molecular level.

57 In this article we introduce a new framework that is based on the collision cross  
58 section ( $\Omega$ ), a quantity that is related to the structure and geometry of a molecule. The  
59 collision cross section of a charged molecule determines its mobility as it travels through  
60 a neutral buffer gas such as  $N_2$  under the influence of a weak and uniform electric field.  
61 Species with open conformation undergo more collisions with buffer gas molecules and  
62 hence travel more slowly than the compact ones (Shvartsburg et al., 2000; Eiceman et al.,  
63 2013). Mobility measurements are usually performed with an Ion Mobility Spectrometer  
64 (IMS), where ions are separated mainly on the basis of their size, geometry, and  
65 subsequent interactions with the buffer gas. The combination of IMS with a Mass  
66 Spectrometer (MS) allows for further selection of ions based on their mass-to-charge  
67 ratios. The resulting IMS-MS plot provides separation of molecules according to two  
68 different properties: geometry (as reflected by the collision cross section) and mass (as  
69 reflected by the mass-to-charge ratio) (Kanu et al., 2008). The Ion Mobility Spectrometry  
70 - Mass Spectrometry (IMS-MS) analytical technique has been widely employed in the  
71 fields of biochemistry (McLean et al., 2005; Liu et al., 2007; Dwivedi et al., 2008;  
72 Roscioli et al., 2013; Groessl et al., 2015) and homeland security (Eiceman and Stone,  
73 2004; Ewing et al., 2001; Fernandez-Maestre et al., 2010). To our knowledge, the  
74 application of IMS-MS to study organic species in the atmosphere, however, has only  
75 been explored very recently (Krechmer et al., 2016).

76 We propose a two-dimensional collision cross section vs. mass-to-charge ratio  
77 ( $\Omega - m/z$ ) space to facilitate the comprehensive investigation of complex organic  
78 mixtures in the atmosphere. Despite the typical complexity of the detailed molecular  
79 mechanism involved in the atmospheric oxidation of organics molecules, they can be  
80 characterized by the distinctive functional groups attached to the carbon backbone  
81 (Zhang and Seinfeld, 2013). We show that the investigated organic classes ( $m/z < 600$ ),  
82 characterized by functional groups including amine, alcohol, carbonyl, carboxylic acid,  
83 ester, and organic sulfate, exhibit unique distribution patterns on the  $\Omega - m/z$  space.  
84 Species of the same chemical class, despite variations in the molecular structures, tend to  
85 develop a narrow band and follow a trend line on the space. Reactions involving changes  
86 in functionalization and fragmentation can be represented by directionalities along or  
87 across these trend lines. The locations and slopes of the measured trend lines are shown



88 to be predicted by the core model (Mason et al., 1972), which characterizes the ion-  
89 neutral interactions as elastic sphere collisions. Within the narrow band produced by each  
90 chemical class on the  $\Omega - m/z$  space, molecular structural assignment is achieved with  
91 the assistance of collision induced dissociation analysis. Measured collision cross  
92 sections are also shown to be consistent with theoretically predicted values from the  
93 trajectory method (Mesleh et al., 1996; Shvartsburg and Jarrold, 1996) and are used to  
94 identify isomers that are separated from an isomeric mixture.

95

## 96 **2. Collision Cross Section Measurements**

### 97 2.1 Materials

98 A collection of chemical standards (ACS grade,  $\geq 96\%$ , purchased from Sigma  
99 Aldrich, St. Louis, MO, USA), classified as amines, alcohols, carbonyls, carboxylic  
100 acids, esters, phenols, and organic sulfates, were used to characterize the performance of  
101 IMS-MS. These chemicals were dissolved in an HPLC-grade solvent consisting of a 70%  
102 methanol / 29% water with 1% formic acid, at a concentration of approximately 10  $\mu\text{M}$ .

### 103 2.2 Instrumentation

104 Ion mobility measurements were performed using an Electrospray Ionization (ESI)  
105 Drift-Tube Ion Mobility Spectrometer (DT-IMS) interfaced to a Time-of-Flight Mass  
106 Spectrometer (TOFMS). The instrument was designed and manufactured by TOFWERK  
107 (Switzerland), with detailed descriptions and schematics provided by several recent  
108 studies (Kaplan et al., 2010; Zhang et al., 2014; Groessl et al., 2015; Krechmer et al.,  
109 2016). In the next few paragraphs, we will present the operating conditions of the ESI-  
110 IMS-TOFMS instrument.

111 Solutions of chemical standards were delivered to the ESI source via a 250  $\mu\text{L}$  gas-  
112 tight syringe (Hamilton, Reno, NV, USA) held on a syringe pump (Harvard Apparatus,  
113 Holliston, MA, USA) at a flow rate of 1  $\mu\text{L min}^{-1}$ . A deactivated fused silica capillary  
114 (360  $\mu\text{m}$  OD, 50  $\mu\text{m}$  ID, 50 cm length, New Objective, Woburn, MA, USA) was used as  
115 the sample transfer line. The ESI source was equipped with an uncoated SilicaTip Emitter  
116 (360  $\mu\text{m}$  OD, 50  $\mu\text{m}$  ID, 30  $\mu\text{m}$  tip ID, New Objective, Woburn, MA, USA) and

117 connected to the capillary through a conductive micro union (IDEX Health & Science,  
118 Oak Harbor, WA, USA). The charged droplets generated at the emitter tip migrate  
119 through a desolvation region in nitrogen atmosphere at room temperature, where ions  
120 evaporate from the droplets and are introduced into the drift tube through a Bradbury-  
121 Nielsen ion gate located at the entrance. The ion gate was operated in the Hadamard  
122 Transform mode, with a closure voltage of  $\pm 50$  V and an average gate pulse frequency of  
123  $1.2 \times 10^3$  Hz. The drift tube was held at a constant temperature ( $340 \pm 3$  K) and atmospheric  
124 pressure ( $\sim 1019$  mbar). A counter flow of  $N_2$  drift gas was introduced at the end of the  
125 drift region at a flow rate of  $1.2$  L  $min^{-1}$ . Ion mobility separation was carried out at a  
126 typical field strength of  $300 - 400$  V  $cm^{-1}$ , resulting in a reduced electric field of  
127 approximately  $1.4 - 1.8$  Td. After exiting from the drift tube, ions were focused into  
128 TOFMS through a pressure-vacuum interface that includes two segmented quadrupoles  
129 that were operated at  $\sim 2$  mbar and  $\sim 5 \times 10^{-3}$  mbar, respectively. Collision Induced  
130 Dissociation (CID) of parent ions is achieved by adjusting the voltages on the ion optical  
131 elements between the two quadrupole stages (Kaplan et al., 2010).

132 The ESI-IMS-TOFMS instrument was operated in the  $m/z$  range of 40 to 1500 with a  
133 total recording time of 90 s for each dataset. The Mass Spectrometer was calibrated using  
134 a mixture of quaternary ammonium salts, reserpine, and a mixture of fluorinated  
135 phosphazines (Ultramark 1621) in the positive mode and ammonium phosphate, sodium  
136 dodecyl sulfate, sodium taurocholate hydrate, and Ultramark 1621 in the negative mode.  
137 The ion mobility measurements were calibrated using tetraethyl ammonium chloride as  
138 the instrument standard and 2,4-lutidine as the mobility standard, as defined shortly  
139 (Fernández-Maestre et al., 2010). Mass spectra and ion mobility spectra were recorded  
140 using the acquisition package “Acquility” (v2.1.0, <http://www.tofwerk.com/acquility>).  
141 Post-processing was performed using the data analysis package “Tofware” (version 2.5.3,  
142 [www.tofwerk.com/tofware](http://www.tofwerk.com/tofware)) running in the Igor Pro (Wavemetrics, OR, USA)  
143 environment.

144 2.3 Calculations

145 The average velocity of an ion in the drift tube ( $v_d$ ) is proportional to its characteristic  
146 mobility constant ( $K / \text{cm}^2 \text{V}^{-1} \text{s}^{-1}$ ) and the electric field intensity ( $E_d$ ), provided that the  
147 field is weak (McDaniel and Mason, 1973):

$$v_d = K E_d \quad (1)$$

148 Experimentally, ion mobility constants can be approximated from the time of ion clouds  
149 spent in the drift tube ( $t_d / \text{s}$ ), given by the rearranged form of Equation (1):

$$t_d = \frac{1}{K} \frac{L_d^2}{V_d} \quad (2)$$

150 where  $L_d$  (cm) is the length of the drift tube and  $V_d$  (V) is the drift voltage. In the present  
151 study, drift time measurements were carried out at six different drift voltages ranging  
152 from 5 kV to 8 kV in  $\sim 1019 \text{ mbar}$  of nitrogen gas at 340 K (Figure S1 in the  
153 supplement). The ion mobility constant ( $K$ ) is derived by linear regression of the recorded  
154 arrival time ( $t_a$ ) of the ion clouds at the detector versus the reciprocal drift voltage:

$$t_a = \frac{L_d^2}{K} \frac{1}{V_d} + t_0 \quad (3)$$

155 Note that the arrival time was determined from the centroid of the best-fit Gaussian  
156 distribution, see Figure S2 in the Supplement. The  $y$ -intercept of the best-fit line  
157 represents the transport time of the ion from the exit of the drift tube to the MS detector  
158 ( $t_0$ ), which exhibits strong  $m/z$  dependency that is attributable to a time-of-flight  
159 separation in the ion optics, see Figure S3 in the Supplement.

160 It is practical to discuss an ion's mobility in terms of the reduced mobility constant  
161 ( $K_0$ ), defined as:

$$K_0 = K \frac{273.15}{T} \frac{P}{1013.25} \quad (4)$$

162 where  $P$  (mbar) is the pressure in the drift region and  $T$  (K) is the buffer gas temperature.  
163 In theory, the parameter  $K_0$  is constant for a given ion in a given buffer gas and can be  
164 used to characterize the intrinsic interactions of that particular ion-molecule pair. In  
165 practice, however,  $K_0$  values from different measurements might not be in good

166 agreement, primarily due to uncertainties in instrumental parameters such as  
 167 inhomogeneities in drift temperature and voltage (Fernández-Maestre et al., 2010). In  
 168 view of these uncertainties, the instrument standard is needed to provide an accurate  
 169 constraint on the instrumental parameters, such as voltage, drift length, pressure, and  
 170 temperature.

$$K_0 \times t_d = \frac{L_d^2}{V_d} \frac{P}{1013.25} \frac{273.15}{T} = C_i \quad (5)$$

171 Tetraethyl ammonium chloride (TEA) is used here as the instrument standard, as its  
 172 reduced mobility is not affected by contaminants in the buffer gas (Fernández-Maestre et  
 173 al., 2010). Given the well-known  $K_0$  and measured  $t_d$  of the protonated TEA ion ( $m/z =$   
 174 130), Equation (5) yields an instrument constant  $C_i$  to calibrate the IMS performance.

175 Unlike TEA, the reduced mobility of species that are more likely to cluster with  
 176 contaminants can be significantly affected by impurities of the buffer gas. This category  
 177 of species can be used as a ‘mobility standard’ to qualitatively indicate the potential  
 178 contamination in the buffer gas. 2,4-Lutidine, with a well-characterized  $K_0$  value of 1.95  
 179  $\text{cm}^2 \text{V}^{-1} \text{s}^{-1}$ , is used as such a mobility standard. As shown Figure S4 in the Supplement,  
 180 the measured mobility of 2,4-Lutidine is 1.5% lower than its theoretical value, indicative  
 181 of the absence of contaminations in the buffer gas.

182 In the low field limit, the collision cross section of an ion ( $\Omega$ ) with a buffer gas is  
 183 related to its reduced mobility ( $K_0$ ) through the modified zero field (so called Mason-  
 184 Schamp) equation (McDaniel and Mason, 1973; Siems et al., 2012):

$$\Omega = \frac{3ze}{16N_0} \left( \frac{2\pi}{k_B \mu T_0} \right)^{1/2} \frac{1}{K_0} \left[ 1 + \left( \frac{\beta_{MT}}{\alpha_{MT}} \right)^2 \left( \frac{v_d}{v_T} \right)^2 \right]^{-1/2} \quad (6a)$$

185 where  $z$  is the net number of integer charges on the ion,  $e$  is the elementary charge,  $N_0$  is  
 186 the number density of buffer gas at 273 K and 1013 mbar,  $k_B$  is the Boltzmann constant,  
 187  $\mu$  is the reduced mass for the molecule-ion pair,  $T_0$  is the standard temperature,  $v_d$  is the  
 188 drift velocity given by Equation (1),  $v_T$  is the thermal velocity, and  $\alpha_{MT}$  and  $\beta_{MT}$  are  
 189 correction coefficients for collision frequency and momentum transfer, respectively,  
 190 given by:

$$\alpha_{\text{MT}} = \frac{2}{3} [1 + \hat{m}f_c + \hat{M}f_h] \quad \beta_{\text{MT}} = \left[ \frac{2}{\hat{m}(1 + \hat{m})} \right]^{1/2} \quad (7)$$

191 where  $\hat{m}$  and  $\hat{M}$  are molecular mass fractions of the ion and buffer gas molecule,  
 192 respectively, and  $f_c$  and  $f_h$  are the fractions of collisions in the cooling and heating classes,  
 193 respectively. Note that the reduced electric field used in this study is maximized at  $\sim 2$   
 194 Td, at which the drift velocity of any given ion is  $\sim$  two orders magnitude lower than its  
 195 thermal velocity, thus the values for  $f_c$  and  $f_h$  are assigned to be 0.5 and 0.5, respectively.  
 196 As all measurements in this study were carried out with nitrogen as the buffer gas, the  
 197 reported collision cross sections will be referred to  $\Omega_{\text{N}_2}$ . **Matlab codes for calculating  $\Omega_{\text{N}_2}$**   
 198 **are given in the Supplement.** Experimental  $\Omega_{\text{N}_2}$  values for a selection of ionic species are  
 199 consistent with those reported in literatures (see Table S1 in the Supplement).

200

### 201 3. Collision Cross Section Modeling

202 Kinetic theory indicates that the quantity  $\Omega$  is an orientationally averaged collision  
 203 integral ( $\Omega_{\text{avg}}^{(l,l)}$ ), which depends on the nature of ion-neutral interaction potential  
 204 (McDaniel and Mason, 1973). Given the potential, the collision integral can be calculated  
 205 through successive integrations over collision trajectories, impact parameters and energy.  
 206 Here we adopt two computational methods, i.e., trajectory method and core model, to  
 207 simulate the average collision integral. The trajectory method is a rigorous calculation of  
 208  $\Omega_{\text{avg}}^{(l,l)}$  by propagating classical trajectories of neutral molecules in a realistic neutral/ion  
 209 potential consisting of a sum of pairwise Lennard-Jones interactions and ion induced  
 210 dipole interactions (Mesleh et al., 1996; Shvartsburg and Jarrold, 1996). The core model  
 211 treats the polyatomic ion as a rigid sphere where the center of charge is displaced from  
 212 the geometry center. The ion-neutral interaction is approximately represented by the cross  
 213 section of two rigid spheres during elastic collisions. **The potential during interaction**  
 214 **includes a long-range attraction term and a short-range repulsion term** (Mason et al.,  
 215 1972).

216 The two models employed here represent opposite directions in the  $\Omega_{\text{avg}}^{(l,l)}$  computation  
 217 methods. The trajectory method is a rigorous calculation of  $\Omega_{\text{avg}}^{(l,l)}$  in a realistic

218 intermolecular potential yet the computation is time consuming. The core model, on the  
219 other hand, substantially simplifies the calculation of  $\Omega_{\text{avg}}^{(l,l)}$  as rigid sphere collisions at the  
220 expense of simulation accuracy. We will show shortly that the core model is used for  
221 locating individual chemical classes on the 2-D  $\Omega_{\text{N}_2} - m/z$  space. Within the band  
222 developed by each chemical class, molecular structure information can be deduced by  
223 comparing the measured collision cross section with those calculated by the trajectory  
224 method.

### 225 3.1 Trajectory Method

226 Molecular structures for L-leucine and D-isoleucine were initially constructed by  
227 Avogadro v1.1.1 (Hanwell et al., 2012). For each molecule, both protonation and  
228 deprotonation sites are created by placing a positive charge on the N-terminal amino  
229 group and a negative charge on the C-terminal carboxyl group, respectively. The  
230 geometry of each ion is further optimized using the Hartree-Fock method with the 6-  
231 31G(d,p) basis set via GAMESS (Schmidt et al., 1993). Partial atomic charges were  
232 estimated using Mulliken population analysis.

233 A freely available software, MOBCAL, developed by Jarrold and coworkers  
234 (<http://www.indiana.edu/~nano/software.html>) was used for computing the collision  
235 integrals. The potential term employed in the trajectory method takes the form:

$$\Phi(\theta, \phi, \gamma, b, r) = 4\epsilon \sum_i^n \left[ \left( \frac{\sigma}{r_i} \right)^{12} - \left( \frac{\sigma}{r_i} \right)^6 \right] - \frac{\alpha_p}{2} \left( \frac{ze}{n} \right)^2 \left[ \left( \sum_i^n \frac{x_i}{r_i^3} \right)^2 + \left( \sum_i^n \frac{y_i}{r_i^3} \right)^2 + \left( \sum_i^n \frac{z_i}{r_i^3} \right)^2 \right] \quad (8)$$

236 where  $\theta$ ,  $\phi$ , and  $\gamma$  are three angles that define the geometry of ion-neutral collision,  $b$  is  
237 the impact parameter,  $\epsilon$  is the depth of the potential well,  $\sigma$  is the finite distance at which  
238 the interaction potential is zero,  $\alpha_p$  is the polarizability of the neutral, which is  $1.710 \times 10^{-}$   
239  $^{24} \text{ cm}^3$  for  $\text{N}_2$  (Olney et al., 1997),  $n$  is the number of atoms in the ion, and  $r_i, x_i, y_i,$  and  $z_i$   
240 are coordinates that define the relative positions of individual atoms with respect to the  
241 buffer gas. Values of the Lenard-Jones parameters,  $\epsilon$  and  $\sigma$ , are taken from the universal  
242 force field (Casewit et al., 1992). The ion-quadruple interaction and the orientation of  $\text{N}_2$   
243 molecule are not considered here (Kim et al., 2008; Campuzano et al., 2012).

244 3.2 Core Model

245 The core model, consisting of a (12-4) central potential displaced from the origin, is  
 246 used to represent interactions of polyatomic ions with N<sub>2</sub> molecules (Mason et al., 1972).  
 247 The (12-4) central potential includes a repulsive  $r^{-12}$  term, which describes the Pauli  
 248 repulsion at short ranges due to overlapping electron orbitals, as well as an attractive  $r^{-4}$   
 249 term, which describes attractions at long ranges due to ion induced dipole:

$$\Phi(r) = \frac{\epsilon}{2} \left\{ \left( \frac{r_m - a}{r - a} \right)^{12} - 3 \left( \frac{r_m - a}{r - a} \right)^4 \right\} \quad (9)$$

250 where  $r$  is the distance between the ion-neutral geometric centers,  $a$  is the location of the  
 251 ionic center of charge measured from the geometrical center of the ion, and  $r_m$  is the  
 252 value of  $r$  at the potential minimum. At temperature of 0 K, the *polarization potential* can  
 253 be expressed as:

$$\Phi_{\text{pol}}(r) = -\frac{e^2 \alpha_p}{2r^4} \quad (10)$$

254

255 where  $\alpha_p$  is the polarizability of the neutral. Thus  $\epsilon$  is given by:

$$\epsilon = \frac{e^2 \alpha_p}{3(r_m - a)^4} \quad (11)$$

256 The collision cross section can be expressed in dimensionless form by extracting its  
 257 dependence on  $r_m$ :

$$\Omega = \Omega^{(1,1)*} \pi r_m^2 \quad (12)$$

258 Tabulations of the dimensionless collision integral ( $\Omega^{(1,1)*}$ ) can be found in literatures  
 259 (Mason et al., 1972) as a function of dimensionless temperature ( $T^*$ ) and core diameter  
 260 ( $a^*$ ), given by:

$$T^* = \frac{kT}{\epsilon} = \frac{3kT(r_m - a)^4}{e^2 \alpha_p} \quad a^* = \frac{a}{r_m} \quad (13)$$

261 Polynomial interpolation of the tabulated  $\Omega^{(1,1)*}$  yielded an analytical expression of the  
 262 collision cross section, with  $r_m$  and  $a$  as adjustable parameters. This expression was then

263 fit to the ion mobility datasets measured in N<sub>2</sub> buffer gas using a nonlinear least-square  
264 regression procedure (Matlab code is available upon request) (Johnson et al., 2004; Kim  
265 et al., 2005; Kim et al., 2008). Best-fit parameters,  $r_m$  and  $a$ , along with predicted vs.  
266 measured collision cross section are given in Table S2 in the Supplementary Information.

267

## 268 4. Collision Cross Section vs. Mass-to-Charge Ratio 2-D Space

### 269 4.1 Distribution of *multi*-Functional Organic Species

270 Figure 1 (A) shows the distribution of organic species, classified as (*di/poly/sugar*)-  
271 alcohol, *tertiary*-amine, *quaternary*-ammonium, (*mono/di*)-carbonyl, (*mono/di/tri*)-  
272 carboxylic acid, (*di*)-ester, organic sulfate, and *multi*-functional compounds, on the  
273 collision cross section vs. mass-to-charge ratio ( $\Omega_{N_2} - m/z$ ) 2-D space. One feature of the  
274 distribution pattern is that species with higher density as pure liquids and carbon  
275 oxidation state tend to occupy the lower region of the  $\Omega_{N_2} - m/z$  space. This is not  
276 surprising given that molecules of smaller collision cross sections tend to be much  
277 denser, and potentially more functionalized, than those with extended and open  
278 geometries. Furthermore, species of the same chemical class tend to occupy a narrow  
279 region and follow a trend line on the  $\Omega_{N_2} - m/z$  space. These observations form the basis  
280 of potentially utilizing locations and trends on the 2-D space to identify chemical classes  
281 to which an unknown compound belongs.

282 Small molecules ( $m/z < 200$ ) with similar size and geometry are situated closely  
283 together, as visualized by the ‘overlaps’ on the space. Improved visual separation of the  
284 species within the overlapping region is obtained by transforming  $\Omega_{N_2}$  to a quantity  
285  $\Delta\Omega_{N_2}$ , defined as the percentage difference between the measured collision cross section  
286 for any given molecular ion and the calculated projection area for a rigid spherical ion-N<sub>2</sub>  
287 pair with the same molecular mass. Since this idealized ion-N<sub>2</sub> pair does not account for  
288 interaction potentials and molecular conformation, it is only used as a reference state to  
289 improve visualization of the  $\Omega_{N_2} - m/z$  2-D space, as shown in Figure 1 (B).



## 290 4.2 $\Omega_{N_2} - m/z$ Trend Lines

291 The  $\Omega_{N_2} - m/z$  trend line visualized on the 2-D space describes the intrinsic increase  
292 in collision cross sections resulting from the increase in molecular mass by extending the  
293 carbon backbone or adding functional groups. It has been used for conformation space  
294 separation of different classes of biomolecules including lipids, peptides, carbohydrates,  
295 and nucleotides (McLean et al., 2005). Here we demonstrate for the first time the  
296 presence of trend lines for small molecules of atmospheric interest, and the trend line  
297 pattern for each chemical class can be predicted by the core model simulations.

298 Figure 2 shows the measured  $\Omega_{N_2}$  as a function of mass-to-charge ratio for (A)  
299 *tertiary-amine* and *quaternary-ammonium*, (B) (*di/poly/sugar*)-alcohol, and (C)  
300 (*mono/oxo/hydroxy*)-carboxylic acid. Also shown are the predicted  $\Omega_{N_2}$  by the core  
301 model, with adjustable parameters optimized by the measured  $\Omega_{N_2}$  for the subcategory  
302 spanning the largest  $m/z$  range in each chemical class. Specifically, *quaternary-*  
303 *ammonium*, propylene glycol, and *alkanoic-acid* are used in constraining the core model  
304 performance to predict the  $\Omega_{N_2} - m/z$  trend lines for amines, alcohols, and carboxylic  
305 acids. Species in each chemical class, regardless of the variety in the carbon skeleton  
306 structure, occupy a narrow range and appear along a  $\Omega_{N_2} - m/z$  trend line. Such a  
307 relationship can be further demonstrated by the goodness of the core model predictions,  
308 i.e., the difference between predicted and measured  $\Omega_{N_2}$  for compounds that are not used  
309 to optimize the core model performance. For amine series, predicted  $\Omega_{N_2}$  values for  
310 lutidine and pyridine are 8.2% and 0.8% higher, respectively, than the measurements. For  
311 alcohol series, the best-fit  $\Omega_{N_2} - m/z$  trend line constrained by propylene glycol can be  
312 used to predict the distribution of sugars and polyols within 3.5% difference on the space.  
313 For carboxylic acid series, hydroxyl-hexadecanoic acid falls closely on the predicted  
314  $\Omega_{N_2} - m/z$  trend line, despite the presence of an alcohol group on the  $C_{16}$  carbon chain.  
315 Predicted  $\Omega_{N_2}$  values for *oxo*-carboxylic acids are 4.4% – 6.1% lower than the  
316 observations. Benzoic acid exhibits a relatively large measurement-prediction gap (6.7%)  
317 potentially due to the presence of an aromatic ring.

318 The demonstrated  $\Omega_{N_2} - m/z$  trend lines provide a useful tool for categorization of  
319 structurally related compounds. Mapping out the locations and distribution patterns for  
320 various functionalities on the 2-D space would therefore facilitate classification of  
321 chemical classes for unknown compounds. It is likely that trend lines extracted from a  
322 complex organic mixture overlap and, as a result, the distribution pattern of unknowns on  
323 the space alone would not provide sufficient information on their molecular identities. In  
324 this case, the fragmentation pattern of unknowns upon collision induced dissociation  
325 (CID) needs to be explored for the functionality identification, as discussed in detail in  
326 Section 4.4. As it is highly unlikely that two distinct molecules will produce identical  
327 IMS, MS, as well as CID-based MS spectra, the 2-D framework therefore virtually  
328 ensures reliable identification of species of atmospheric interest.

### 329 4.3 Trajectories for Atmospheric Transformation Processes

330 Functionalization (the addition of oxygen-containing functional groups) and  
331 fragmentation (the oxidative cleavage of C–C bonds) are key processes during  
332 atmospheric transformation of organics. Reactions involving changes in functionalization  
333 and fragmentation can be represented by directionalities on the  $\Omega_{N_2} - m/z$  space, as  
334 illustrated by the distribution pattern of carboxylic acids in Figure 3. Addition of one  
335 carbon atom always leads to an increase in mass and collision cross section, with a  
336 generic slope of approximately  $5 \text{ \AA}^2/\text{Th}$ . Although the addition of one oxygen atom in the  
337 form of a carbonyl group results in a similar increase in the molecular mass, it leads to a  
338 shallower slope compared with that from expanding the carbon chain. Addition of  
339 carboxylic or hydroxyl groups does not necessarily lead to an increase in the collision  
340 cross section, as the formation of the intramolecular hydrogen bonding ( $\text{O} - \text{H} \cdots \text{O}^-$ )  
341 could result in a more compact conformation of the molecule. In general, fragmentation  
342 moves materials to the bottom left and functionalization to the right on the space.

### 343 4.4 Molecular Structure Elucidation of *multi*-Functional Species

344 The demonstrated  $\Omega_{N_2} - m/z$  relationship provides a useful tool to identify the  
345 chemical class to which an unknown species belongs. To further identify its molecular  
346 structure, knowledge on the electrospray ionization mechanism for the generation of

347 *quasi*-molecular ions, as well as fragmentation patterns of the molecular ion upon  
348 collision induced dissociation (CID), is required.

349 For species investigated in this study, their integral molecular structures are  
350 maintained during electrospray ionization. An exhibition of molecular formulas of ionic  
351 species is given in Table 1. Depending on the proton susceptibility of functional groups,  
352 amines, esters, and aromatic aldehydes are sensitive to the ESI(+) mode, whereas  
353 carboxylic acids and organic sulfates yield high signal-to-noise ratios in the ESI(-)  
354 spectra. Specifically, the positive mass spectra collected for amines and amino acids  
355 show major ions at  $m/z$  values corresponding to the protonated cations ( $[M+H]^+$ ).  
356 Sodiated clusters ( $[M+Na]^+$ ) of esters were observed as the dominant peak in the ESI(+)  
357 spectra. Aromatic aldehydes combine with a methyl group ( $[M+CH_3]^+$ ) via the gas-phase  
358 aldol reaction between protonated aldehydes and methanol in the positive mode. Sugars  
359 and polyols can be readily ionized in both positive and negative mode with the addition  
360 of a proton or sodium ion or deprotonation. Extensive formation of oligomers is observed  
361 from the positive mass spectra of propylene glycol, with the deprotonated propanol ( $-$   
362  $OCH_2CH(CH_3)-$ ) as the primary building block. Monoanions ( $[M-H]^-$ ) were exclusively  
363 observed in the negative mass spectra of (*mono/di/tri/multi*)-carboxylic acids due to the  
364 facile ionization afforded by the carboxylic group. It is worth noting that quantification of  
365 these species requires prior chromatographic separation to avoid matrix suppression on  
366 the analyte of interest (Zhang et al., 2016) or alternative ionization scheme that is  
367 compatible with the high-voltage IMS inlet and does not induce matrix effects.

368 The instrument used in this study enables the collision induced dissociation of the  
369 abovementioned precursor ions after ion mobility separation but prior to the mass  
370 spectrometer (IMS-CID-MS). As a consequence, product ions exhibit the identical  
371 mobility (drift time) with that of the precursor ion. IMS-CID-MS spectra for individual  
372 compounds are then generated by the extraction of “mobility-selected” MS spectra that  
373 contain both precursor and fragments. The major advantage of this approach is that it is  
374 possible to obtain fragmentation spectra for all precursor ions simultaneously. This is in  
375 contrast to MS/MS techniques which require the isolation of a small mass window prior  
376 to fragmentation which can be a problem for very complex samples or time-resolved  
377 analysis. Figure 4 shows the measured drift time for the precursor and product ions

378 generated from species representative of amines, aldehydes, carboxylic acids, esters, and  
379 nitro compounds. Collision induced dissociation patterns of these species are used to  
380 elucidate the fragmentation mechanisms for corresponding functional groups. The  
381 deprotonated carboxylic acid is known to undergo facile decarboxylation to produce a  
382 carbanion. If additional carboxylic groups are present in the molecule, combined loss of  
383 water and carbon dioxide is expected (Grossert et al., 2005). Alternatively, the presence  
384 of an –OH group adjacent to the carboxylic group would usually result in a neutral loss of  
385 formic acid (Greene et al., 2013), see the fragmentation pattern for 16-  
386 hydroxyhexadecanoic acid as an illustration. Scission of the C–O bond in the ester  
387 structure or the C–O bond between the secondary/tertiary carbon and the alcoholic  
388 oxygen is observed for the ester series examined, consistent with previous studies (Zhang  
389 et al., 2015). A primary fragmentation resulting in loss of CO was evident in the spectrum  
390 of methylate derivative of protonated carbonyls ( $\text{RCHOCH}_3^+$ ) (Neta et al., 2014). The  
391 IMS-CID-MS spectrum of deprotonated 4-nitrophenol is shown as a representative of  
392 organic nitro compounds. Two dominant peaks at  $m/z$  108 and  $m/z$  92 are observed,  
393 resulting from the neutral loss of NO and NO<sub>2</sub>, respectively.

394 Signal intensities of the fragments from the CID pathway of the precursor ion depend  
395 on the collision voltage, as shown in Figure 5. At low collision voltages, the precursor  
396 ions predominate with transmission optimized at approximately 5 V potential gradient.  
397 As the collision voltage increases, the intensity of the precursor ion decreases and that of  
398 each product ion increases, eventually reaching a maximum level, and then decreases due  
399 to subsequent fragmentation. The dependence of the product ion abundance on the  
400 collision voltage provides information on the relative strength of the covalent bond at  
401 which the parent molecule fragments. Consequently, the energy required to induce a  
402 certain fragmentation pathway could potentially also serve as an additional parameter for  
403 structure elucidation. For example, the predominance of the product ion at  $m/z$  149  
404 suggests that cleavage of the carbonyl-oxygen bond in the ester moiety is the dominant  
405 fragmentation pathway upon CID of dioctyl phthalate ( $\text{C}_{24}\text{H}_{38}\text{O}_4$ ).

## 406 4.5 Resolving Isomeric Mixtures

407 Here we demonstrate the separation of isomers on the  $\Omega_{N_2} - m/z$  space using the  
408 mixture of L-leucine and D-isoleucine as an illustration, as they can be directly ionized  
409 by electrospray in both positive and negative modes due to the presence of amino and  
410 carboxyl groups. We refer the reader to Krechmer et al. (2016) for the mobility separation  
411 of atmospheric relevant isomeric species. Figure 6 (A and B) shows a single peak that  
412 corresponds to the protonated ( $[M+H]^+$ ,  $m/z = 132$ ) and deprotonated ( $[M-H]^-$ ,  $m/z =$   
413 130) forms of the leucine mixture, respectively, in the positive and negative MS spectra.  
414 Upon further separation based on their distinct mobility in the  $N_2$  buffer gas, the leucine  
415 mixture is clearly resolved in the positive mode, while a broad peak is observed in the  
416 negative ion mobility spectrum, see Figure 6 (C and D). Note that a typical IMS resolving  
417 power ( $t/dt_{50}$ ) of 100 leads to a baseline separation of leucine isomers that differ by 0.3  
418 ms in the measured drift time. Figure 6 (E-H) shows the IMS spectra for individual  
419 leucine isomeric configurations, which provide precise constraints for the peak  
420 assignment in the leucine mixture. Also given here are the measured vs. predicted  
421 collision cross sections for each isomer, with predictions lower by 3.3 ~ 6.9% compared  
422 with the measurements. However, despite the underprediction, the model using trajectory  
423 method correctly predicts the relative collision cross sections of the isomers and therefore  
424 also the order in which they appear in the IMS spectrum. The underprediction of  $\Omega_{N_2}$   
425 may result from the simplification that linear  $N_2$  molecules are considered as elastic and  
426 specular spheres in the current model configuration (Larriba-Andaluz and Hogan Jr,  
427 2014). Further development of the model to more appropriately predict  $\Omega_{N_2}$  values is  
428 needed.

429

## 430 5. Conclusions

431 We propose a new metric, collision cross section ( $\Omega$ ), for characterizing organic  
432 species of atmospheric interest. Collision cross section represents an effective interaction  
433 area between a charged molecule and neutral buffer gas as it travels through under the  
434 action of a weak electric field, and thus relates to the chemical structure and 3-D  
435 conformation of this molecule. The collision cross section of individual molecular ions is

436 calculated from the ion mobility measurements using an Ion Mobility Spectrometer. In  
437 this study, we provide the derived  $\Omega_{N_2}$  values for a series of organic species including  
438 amines, alcohols, carbonyls, carboxylic acids, esters, organic sulfates, and *multi-*  
439 functional compounds.

440 The collision cross section, when coupled with mass-to-charge ratio, provides a 2-D  
441 framework for characterizing the molecular signature of atmospheric organic  
442 components. The  $\Omega_{N_2} - m/z$  space is employed to guide our fundamental understanding  
443 of chemical transformation of organic species in the atmosphere. We show that different  
444 chemical classes tend to develop unique narrow bands with trend lines on the  $\Omega_{N_2} - m/z$   
445 space. Trajectories associated with atmospheric transformation mechanisms either cross  
446 or follow these trend lines through the space. The demonstrated  $\Omega_{N_2} - m/z$  trend lines  
447 provide a useful tool for resolving various functionalities in the complex organic mixture.  
448 These intrinsic trend lines can be predicted by the core model, which provides a guide for  
449 locating unknown functionalities on the  $\Omega_{N_2} - m/z$  space.

450 Within each band that that belongs to a particular chemical class on the space, species  
451 can be further separated based on their distinct structures and geometries. We  
452 demonstrate the utility of collision induced dissociation technique, upon which the  
453 resulted product ions share the identical drift time as the precursor ion, to facilitate the  
454 elucidation of molecular structures of organic species. We employ the  $\Omega_{N_2} - m/z$   
455 framework for separation of isomeric mixtures as well by comparing the measured  
456 collision cross sections with those predicted using the trajectory method. Further  
457 advances in algorithms to correctly predict collision cross sections *ab initio* from  
458 molecular coordinates are therefore also expected to significantly improve identification  
459 of unknowns.

460

## 461 **Acknowledgement**

462 This study was supported by the U.S. National Science Foundation (NSF)  
463 Atmospheric and Geospace Sciences (AGS) grants 1537446. J.E.K. was supported by  
464 fellowships from CIRES and EPA STAR (FP-91770901-0). J.L.J. was supported by DOE

465 (BER/ASR) DE-SC0011105 and EPA STAR 83587701-0. This manuscript has not been  
466 reviewed by EPA and thus no endorsement should be inferred.

467

468 **Appendix:**

469  $a$  (Å): the location of the ionic center of charge from the geometrical center of the ion.

470  $a^*$ : the dimensionless core diameter.

471  $\alpha_{MT}$ : the correction coefficient for collision frequency.

472  $\alpha_p$  (cm<sup>3</sup>): the polarizability of the neutral.

473  $\beta_{MT}$ : the correction coefficient for momentum transfer.

474  $C_i$ : the instrument constant that is used to calibrate the IMS performance.

475  $\epsilon$  (eV): the depth of the potential well.

476  $E_d$  (V/cm): the electric field intensity in the drift tube.

477  $\Phi$  (eV): the ion-neutral interaction potential.

478  $f_c$ : the fraction of collisions in the cooling classes.

479  $f_h$ : the fraction of collisions in the heating classes.

480  $k_B$  (m<sup>2</sup> kg s<sup>-2</sup> K<sup>-1</sup>): Boltzmann constant.

481  $K$  (cm<sup>2</sup> V<sup>-1</sup> s<sup>-1</sup>): the characteristic mobility constant of a given ion.

482  $K_0$  (cm<sup>2</sup> V<sup>-1</sup> s<sup>-1</sup>): the reduced mobility constant of a given ion.

483  $L_d$  (V/cm): the length of the drift tube.

484  $\hat{m}$ : the mass fraction of the ion in the ion-molecule pair.

485  $\hat{M}$ : the mass fraction of the buffer gas molecule (N<sub>2</sub>) in the ion-molecule pair.

486  $m/z$  (Th): the mass-to-charge ratio of any given ion.

487  $N_0$  (# cm<sup>-3</sup>): the number density of buffer gas at 273 K and 1013 mbar.

488  $\Omega$  (Å<sup>2</sup>): the collision cross section.

489  $\Omega_{N_2}$  (Å<sup>2</sup>): the collision cross section using N<sub>2</sub> as the buffer gas.

490  $\Omega_{avg}^{(1,1)}$ : the orientationally averaged collision integral.

491  $\Omega^{(1,1)*}$ : the dimensionless collision integral.

492  $P$  (mbar): the pressure in the drift region.

493  $r$  (Å): the distance between the ion-neutral geometric centers.

494  $r_m$  (Å): the value of  $r$  at the potential minimum.

495  $\sigma$  (Å): the finite distance at which the interaction potential is zero.  
496  $T$  (K): the buffer gas temperature.  
497  $T_0$  (K): the standard temperature.  
498  $T^*$ : the dimensionless temperature.  
499  $t_a$  (s): the recorded arrival time of the ion clouds at the detector.  
500  $t_d$  (s): the time of ion clouds spent in the drift tube.  
501  $t_0$  (s): the transport time of ion clouds from the exit of the drift tube to the MS detector.  
502  $v_d$  (s): the average velocity of an ion in the drift tube.  
503  $v_T$  (m s<sup>-1</sup>): the thermal velocity.  
504  $V_d$  (V): the voltage applied to the drift tube.  
505  $z$ : the net number of integer charges on the ion.

506

#### 507 **References:**

- 508 Campuzano, I., Bush, M. F., Robinson, C. V., Beaumont, C., Richardson, K., Kim, H.,  
509 and Kim, H. I.: Structural characterization of drug-like compounds by ion mobility mass  
510 spectrometry: comparison of theoretical and experimentally derived nitrogen collision  
511 cross sections, *Anal. Chem.*, 84, 1026-1033, 2012.
- 512 Casewit, C. J., Colwell, K. S., and Rappe, A. K.: Application of a universal force field to  
513 organic molecules, *J. Am. Chem. Soc.*, 114, 10035-10046, 1992.
- 514 Donahue, N. M., Kroll, J. H., Pandis, S. N., and Robinson, A. L.: A two-dimensional  
515 volatility basis set—Part 2: Diagnostics of organic-aerosol evolution, *Atmos. Chem. Phys.*,  
516 12, 615-634, 2012.
- 517 Dwivedi, P., Wu, P., Klopsch, S. J., Puzon, G. J., Xun, L., and Hill Jr, H. H.: Metabolic  
518 profiling by ion mobility mass spectrometry (IMMS), *Metabolomics*, 4, 63-80, 2008.
- 519 Eiceman, G. A., and Stone, J. A.: Ion mobility spectrometers in national defence, *Anal.*  
520 *Chem.*, 76, 390-397, 2004.
- 521 Eiceman, G. A., Karpas, Z., and Hill Jr, H. H.: Ion mobility spectrometry, CRC press,  
522 2013.
- 523 Ewing, R. G., Atkinson, D. A., Eiceman, G. A., and Ewing, G. J.: A critical review of ion  
524 mobility spectrometry for the detection of explosives and explosive related compounds,  
525 *Talanta*, 54, 515-529, 2001.
- 526 Fernandez-Maestre, R., Harden, C. S., Ewing, R. G., Crawford, C. L., and Hill, H. H., Jr.:  
527 Chemical standards in ion mobility spectrometry, *Analyst*, 135, 1433-1442, 2010.
- 528 Fernández-Maestre, R., Harden, C. S., Ewing, R. G., Crawford, C. L., and Hill, H. H.:  
529 Chemical standards in ion mobility spectrometry, *Analyst*, 135, 1433-1442, 2010.



530 Greene, L. E., Grossert, J. S., and White, R. L.: Correlations of ion structure with  
531 multiple fragmentation pathways arising from collision-induced dissociations of selected  
532  $\alpha$ -hydroxycarboxylic acid anions, *J. Mass Spectrom.*, 48, 312-320, 2013.

533 Groessl, M., Graf, S., and Knochenmuss, R.: High resolution ion mobility-mass  
534 spectrometry for separation and identification of isomeric lipids, *Analyst*, 140, 6904-  
535 6911, 2015.

536 Grossert, J. S., Fancy, P. D., and White, R. L.: Fragmentation pathways of negative ions  
537 produced by electrospray ionization of acyclic dicarboxylic acids and derivatives, *Can. J.*  
538 *Chem.*, 83, 1878-1890, 2005.

539 Hanwell, M. D., Curtis, D. E., Lonie, D. C., Vandermeersch, T., Zurek, E., and  
540 Hutchison, G. R.: Avogadro: An advanced semantic chemical editor, visualization, and  
541 analysis platform, *J. Cheminform.*, 4, 10.1186/1758-2946-4-17, 2012.

542 Heald, C. L., Kroll, J. H., Jimenez, J. L., Docherty, K. S., DeCarlo, P. F., Aiken, A. C.,  
543 Chen, Q., Martin, S. T., Farmer, D. K., and Artaxo, P.: A simplified description of the  
544 evolution of organic aerosol composition in the atmosphere, *Geophys. Res. Lett.*, 37,  
545 L08803, 10.1029/2010GL042737, 2010.

546 Johnson, P. V., Kim, H. I., Beegle, L. W., and Kanik, I.: Electrospray ionization ion  
547 mobility spectrometry of amino acids: ion mobilities and a mass-mobility correlation, *J.*  
548 *Phys. Chem. A*, 108, 5785-5792, 2004.

549 Kanu, A. B., Dwivedi, P., Tam, M., Matz, L., and Hill, H. H.: Ion mobility-mass  
550 spectrometry, *J. Mass Spectrom.*, 43, 1-22, 2008.

551 Kaplan, K., Graf, S., Tanner, C., Gonin, M., Fuhrer, K., Knochenmuss, R., Dwivedi, P.,  
552 and Hill Jr, H. H.: Resistive Glass IM-TOFMS, *Anal. Chem.*, 82, 9336-9343, 2010.

553 Kim, H., Kim, H. I., Johnson, P. V., Beegle, L. W., Beauchamp, J. L., Goddard, W. A.,  
554 and Kanik, I.: Experimental and theoretical investigation into the correlation between  
555 mass and ion mobility for choline and other ammonium cations in N<sub>2</sub>, *Anal. Chem.*, 80,  
556 1928-1936, 2008.

557 Kim, H. I., Johnson, P. V., Beegle, L. W., Beauchamp, J. L., and Kanik, I.: Electrospray  
558 ionization ion mobility spectrometry of carboxylate anions: Ion mobilities and a mass-  
559 mobility correlation, *J. Phys. Chem. A*, 109, 7888-7895, 2005.

560 Krechmer, J. E., Groessl, M., Zhang, X., Junninen, H., Massoli, P., Lambe, A. T.,  
561 Kimmel, J. R., Cubison, M. J., Graf, S., Lin, Y. H., Budisulistiorini, S. H., Zhang, H.,  
562 Surratt, J. D., Knochenmuss, R., Jayne, J. T., Worsnop, D. R., Jimenez, J. L., and  
563 Canagaratna, M. R.: Ion Mobility Spectrometry-Mass Spectrometry (IMS-MS) for on-  
564 and off-line analysis of atmospheric gas and aerosol species, *Atmos. Meas. Tech.*, 9,  
565 3245-3262, 2016.

566 Kroll, J. H., Donahue, N. M., Jimenez, J. L., Kessler, S. H., Canagaratna, M. R., Wilson,  
567 K. R., Altieri, K. E., Mazzoleni, L. R., Wozniak, A. S., Bluhm, H., Mysak, E. R., Smith,  
568 J. D., Kolb, C. E., and Worsnop, D. R.: Carbon oxidation state as a metric for describing  
569 the chemistry of atmospheric organic aerosol, *Nature Chem.*, 3, 133-139, 2011.

570 Larriba-Andaluz, C., and Hogan Jr, C. J.: Collision cross section calculations for  
571 polyatomic ions considering rotating diatomic/linear gas molecules, *J. Chem. Phys.*, 141,  
572 194107, doi.org/10.1063/1.4901890, 2014.

573 Liu, X., Valentine, S. J., Plasencia, M. D., Trimpin, S., Naylor, S., and Clemmer, D. E.:  
574 Mapping the human plasma proteome by SCX-LC-IMS-MS, *J. Am. Soc. Mass*  
575 *Spectrom.*, 18, 1249-1264, 2007.

576 Mason, E. A., O'Hara, H., and Smith, F. J.: Mobilities of polyatomic ions in gases: core  
577 model, *J. Phys. B*, 5, 169-172, 1972.

578 McDaniel, E. W., and Mason, E. A.: *The mobility and diffusion of ions in gases*, Wiley,  
579 1973.

580 McLean, J. A., Ruotolo, B. T., Gillig, K. J., and Russell, D. H.: Ion mobility–mass  
581 spectrometry: a new paradigm for proteomics, *Int. J. Mass Spectrom.*, 240, 301-315,  
582 2005.

583 Mesleh, M. F., Hunter, J. M., Shvartsburg, A. A., Schatz, G. C., and Jarrold, M. F.:  
584 Structural information from ion mobility measurements: effects of the long-range  
585 potential, *J. Phys. Chem.*, 100, 16082-16086, 1996.

586 Neta, P., Simón - Manso, Y., Liang, Y., and Stein, S. E.: Loss of H<sub>2</sub> and CO from  
587 protonated aldehydes in electrospray ionization mass spectrometry, *Rapid Commun.*  
588 *Mass Spectrom.*, 28, 1871-1882, 2014.

589 Olney, T. N., Cann, N. M., Cooper, G., and Brion, C. E.: Absolute scale determination  
590 for photoabsorption spectra and the calculation of molecular properties using dipole sum-  
591 rules, *Chem. Phys.*, 223, 59-98, 1997.

592 Pöschl, U., and Shiraiwa, M.: Multiphase Chemistry at the Atmosphere–Biosphere  
593 Interface Influencing Climate and Public Health in the Anthropocene, *Chem. Rev.*, 115,  
594 4440-4475, 2015.

595 Roscioli, K. M., Zhang, X., Li, S. X., Goetz, G. H., Cheng, G., Zhang, Z., Siems, W. F.,  
596 and Hill, H. H.: Real time pharmaceutical reaction monitoring by electrospray ion  
597 mobility-mass spectrometry, *Int. J. Mass Spectrom.*, 336, 27-36, 2013.

598 Schmidt, M. W., Baldrige, K. K., Boatz, J. A., Elbert, S. T., Gordon, M. S., Jensen, J.  
599 H., Koseki, S., Matsunaga, N., Nguyen, K. A., and Su, S.: General atomic and molecular  
600 electronic structure system, *J. Comput. Chem.*, 14, 1347-1363, 1993.

601 Shvartsburg, A. A., and Jarrold, M. F.: An exact hard-spheres scattering model for the  
602 mobilities of polyatomic ions, *Chem. Phys. Lett.*, 261, 86-91, 1996.

603 Shvartsburg, A. A., Liu, B., Jarrold, M. F., and Ho, K.-M.: Modeling ionic mobilities by  
604 scattering on electronic density isosurfaces: Application to silicon cluster anions, *J.*  
605 *Chem. Phys.*, 112, 4517-4526, 2000.

606 Siems, W. F., Viehland, L. A., and Hill Jr, H. H.: Improved momentum-transfer theory  
607 for ion mobility. 1. Derivation of the fundamental equation, *Anal. Chem.*, 84, 9782-9791,  
608 2012.

609 Zhang, X., and Seinfeld, J. H.: A functional group oxidation model (FGOM) for SOA  
610 formation and aging, *Atmos. Chem. Phys.*, 13, 5907-5926, 2013.

611 Zhang, X., Knochenmuss, R., Siems, W. F., Liu, W., Graf, S., and Hill, H. H., Jr.:  
612 Evaluation of Hadamard transform atmospheric pressure ion mobility time-of-flight mass  
613 spectrometry for complex mixture analysis, *Anal. Chem.*, 86, 1661-1670, 2014.

614 Zhang, X., McVay, R. C., Huang, D. D., Dalleska, N. F., Aumont, B., Flagan, R. C., and  
615 Seinfeld, J. H.: Formation and evolution of molecular products in  $\alpha$ -pinene secondary  
616 organic aerosol, *Proc. Natl. Acad. Sci. USA*, 112, 14168-14173, 2015.

617 Zhang, X., Dalleska, N. F., Huang, D. D., Bates, K. H., Sorooshian, A., Flagan, R. C.,  
618 and Seinfeld, J. H.: Time-resolved molecular characterization of organic aerosols by  
619 PILS+ UPLC/ESI-Q-TOFMS, *Atmos. Environ.*, 130, 180-189, 2016.

620

Table 1. Overview of organic standards investigated in this study.

| Class                | Chemical                      | Molecular Formula | Ion                    |                  | $\Omega_{N_2}$<br>( $\text{\AA}^2$ ) | Molecular Structure       |
|----------------------|-------------------------------|-------------------|------------------------|------------------|--------------------------------------|---------------------------|
|                      |                               |                   | Formula                | $m/z$            |                                      |                           |
| Amine                | Tetraethyl ammonium chloride  | $C_8H_{20}NCl$    | $[M-Cl]^+$             | 130.16           | 122.1                                |                           |
|                      | Tetrapropyl ammonium chloride | $C_{12}H_{28}NCl$ | $[M-Cl]^+$             | 186.10           | 143.8                                |                           |
|                      | Tetrabutyl ammonium iodide    | $C_{16}H_{36}NI$  | $[M-I]^+$              | 242.17           | 165.8                                |                           |
|                      | Tetrapentyl ammonium chloride | $C_{20}H_{44}NCl$ | $[M-Cl]^+$             | 298.35           | 190.0                                |                           |
|                      | Tetraheptyl ammonium chloride | $C_{28}H_{60}NCl$ | $[M-Cl]^+$             | 410.47           | 236.5                                |                           |
|                      | 2,4-Lutidine                  | $C_7H_9N$         | $[M+H]^+$              | 108.08           | 123.4                                |                           |
|                      | 2,6-Di-tert-butylpyridine     | $C_{13}H_{21}N$   | $[M+H]^+$              | 192.17           | 145.0                                |                           |
| Amino acid           | L-Leucine                     | $C_6H_{13}NO_2$   | $[M+H]^+$<br>$[M-H]^-$ | 132.10<br>130.09 | 137.8<br>144.4                       |                           |
|                      | D-Isoleucine                  | $C_6H_{13}NO_2$   | $[M+H]^+$<br>$[M-H]^-$ | 132.10<br>130.09 | 135.2<br>140.3                       |                           |
| mono Carboxylic Acid | Benzoic acid                  | $C_7H_6O_2$       | $[M-H]^-$              | 121.03           | 128.6                                |                           |
|                      | Octanoic acid                 | $C_8H_{16}O_2$    | $[M-H]^-$              | 143.11           | 144.7                                |                           |
|                      | 2-Butyloctanoic acid          | $C_{12}H_{24}O_2$ | $[M-H]^-$              | 199.17           | 162.0                                |                           |
|                      | Tridecanoic acid              | $C_{13}H_{26}O_2$ | $[M-H]^-$              | 213.19           | 166.2                                | $CH_3(CH_2)_{10}CH_2COOH$ |
|                      | Pentadecanoic acid            | $C_{15}H_{30}O_2$ | $[M-H]^-$              | 241.22           | 173.7                                | $CH_3(CH_2)_{12}CH_2COOH$ |
|                      | Palmitic acid                 | $C_{16}H_{32}O_2$ | $[M-H]^-$              | 255.23           | 177.9                                | $CH_3(CH_2)_{13}CH_2COOH$ |
|                      | Stearic acid                  | $C_{18}H_{36}O_2$ | $[M-H]^-$              | 283.26           | 185.4                                | $CH_3(CH_2)_{15}CH_2COOH$ |
| Oleic acid           | $C_{18}H_{34}O_2$             | $[M-H]^-$         | 281.25                 | 186.9            | $CH_3(CH_2)_6CH_2CH=CH(CH_2)_7COOH$  |                           |

|                                       |                                         |                                                |                                                |                     |        |       |
|---------------------------------------|-----------------------------------------|------------------------------------------------|------------------------------------------------|---------------------|--------|-------|
| <i>di/multi</i><br>Carboxylic<br>Acid | Succinic acid                           | C <sub>4</sub> H <sub>6</sub> O <sub>4</sub>   | [M-H] <sup>-</sup>                             | 117.02              | 124.6  |       |
|                                       | Glutaric acid                           | C <sub>5</sub> H <sub>8</sub> O <sub>4</sub>   | [M-H] <sup>-</sup>                             | 131.03              | 128.4  |       |
|                                       | Adipic acid                             | C <sub>6</sub> H <sub>10</sub> O <sub>4</sub>  | [M-H] <sup>-</sup>                             | 145.05              | 131.5  |       |
|                                       | Pimelic acid                            | C <sub>7</sub> H <sub>12</sub> O <sub>4</sub>  | [M-H] <sup>-</sup>                             | 159.06              | 134.0  |       |
|                                       | Azelaic acid                            | C <sub>9</sub> H <sub>16</sub> O <sub>4</sub>  | [M-H] <sup>-</sup>                             | 187.09              | 143.5  |       |
|                                       | Sebacic acid                            | C <sub>10</sub> H <sub>18</sub> O <sub>4</sub> | [M-H] <sup>-</sup>                             | 201.11              | 148.9  |       |
|                                       | 1,2,3-Propane<br>tricarboxylic<br>acid  | C <sub>6</sub> H <sub>8</sub> O <sub>6</sub>   | [M-H] <sup>-</sup>                             | 175.02              | 122.2  |       |
|                                       | Cyclohexane<br>tricarboxylic<br>acid    | C <sub>9</sub> H <sub>12</sub> O <sub>6</sub>  | [M-H] <sup>-</sup>                             | 215.06              | 135.0  |       |
|                                       | Mellitic acid                           | C <sub>12</sub> H <sub>6</sub> O <sub>12</sub> | [M-H <sub>2</sub> O-H] <sup>-</sup>            | 322.96              | 154.6  |       |
|                                       | Ester                                   | Dibutyl oxalate                                | C <sub>10</sub> H <sub>18</sub> O <sub>4</sub> | [M+Na] <sup>+</sup> | 225.11 | 170.0 |
| Dibutyl phtahlate                     |                                         | C <sub>16</sub> H <sub>22</sub> O <sub>4</sub> | [M+Na] <sup>+</sup>                            | 301.14              | 192.4  |       |
|                                       |                                         |                                                | [2M+Na] <sup>+</sup>                           | 579.29              | 255.5  |       |
|                                       | Diocetyl phthalate                      | C <sub>24</sub> H <sub>38</sub> O <sub>4</sub> | [M+H] <sup>+</sup>                             | 391.28              | 203.6  |       |
| Alcohol                               | Propylene glycol                        | C <sub>3</sub> H <sub>8</sub> O <sub>2</sub>   | [2M-2H <sub>2</sub> O+Na] <sup>+</sup>         | 215.12              | 144.8  |       |
|                                       |                                         |                                                | [4M-3H <sub>2</sub> O+Na] <sup>+</sup>         | 273.17              | 156.4  |       |
|                                       |                                         |                                                | [5M-4H <sub>2</sub> O+H] <sup>+</sup>          | 309.23              | 165.7  |       |
|                                       |                                         |                                                | [5M-4H <sub>2</sub> O+Na] <sup>+</sup>         | 331.21              | 169.6  |       |
|                                       |                                         |                                                | [6M-5H <sub>2</sub> O+H] <sup>+</sup>          | 367.27              | 179.1  |       |
|                                       |                                         |                                                | [6M-5H <sub>2</sub> O+Na] <sup>+</sup>         | 389.24              | 181.6  |       |
|                                       |                                         |                                                | [7M-6H <sub>2</sub> O+H] <sup>+</sup>          | 425.31              | 190.8  |       |
|                                       |                                         |                                                | [7M-6H <sub>2</sub> O+Na] <sup>+</sup>         | 447.28              | 193.9  |       |
|                                       |                                         |                                                | [8M-7H <sub>2</sub> O+H] <sup>+</sup>          | 483.35              | 204.7  |       |
|                                       |                                         |                                                | [8M-7H <sub>2</sub> O+Na] <sup>+</sup>         | 505.32              | 206.2  |       |
|                                       | [9M-8H <sub>2</sub> O+H] <sup>+</sup>   | 541.39                                         | 218.5                                          |                     |        |       |
|                                       | [9M-8H <sub>2</sub> O+Na] <sup>+</sup>  | 563.36                                         | 219.3                                          |                     |        |       |
|                                       | [10M-9H <sub>2</sub> O+H] <sup>+</sup>  | 599.42                                         | 231.3                                          |                     |        |       |
|                                       | [10M-9H <sub>2</sub> O+Na] <sup>+</sup> | 621.40                                         | 231.8                                          |                     |        |       |

|                                        |                                              |                                                     |                                                         |                  |                |  |
|----------------------------------------|----------------------------------------------|-----------------------------------------------------|---------------------------------------------------------|------------------|----------------|--|
|                                        | DL-Threitol                                  | C <sub>4</sub> H <sub>10</sub> O <sub>4</sub>       | [M+Na] <sup>+</sup>                                     | 145.05           | 133.0          |  |
|                                        | Xylitol                                      | C <sub>5</sub> H <sub>12</sub> O <sub>5</sub>       | [M-H] <sup>-</sup>                                      | 151.06           | 131.2          |  |
|                                        | Sucrose                                      | C <sub>12</sub> H <sub>22</sub> O <sub>11</sub>     | [M-H] <sup>-</sup><br>[M+Na] <sup>+</sup>               | 341.11<br>365.11 | 167.6<br>175.1 |  |
| Carbonyl                               | Hexane-3,4-dione                             | C <sub>6</sub> H <sub>10</sub> O <sub>2</sub>       | [M+H] <sup>+</sup><br>[M+CH <sub>3</sub> ] <sup>+</sup> | 115.08<br>129.09 | 115.7<br>121.3 |  |
|                                        | Acetophenone                                 | C <sub>8</sub> H <sub>8</sub> O                     | [M+CH <sub>3</sub> ] <sup>+</sup>                       | 135.08           | 120.4          |  |
|                                        | Cinnamaldehyde                               | C <sub>9</sub> H <sub>8</sub> O                     | [M+CH <sub>3</sub> ] <sup>+</sup>                       | 147.08           | 123.9          |  |
| <i>multi</i><br>Functional<br>Compound | Levulinic acid                               | C <sub>5</sub> H <sub>8</sub> O <sub>3</sub>        | [M-H] <sup>-</sup>                                      | 115.04           | 130.0          |  |
|                                        | 4-Acetylbutyric acid                         | C <sub>6</sub> H <sub>10</sub> O <sub>3</sub>       | [M-H] <sup>-</sup>                                      | 129.06           | 134.5          |  |
|                                        | Homovanillic acid                            | C <sub>9</sub> H <sub>10</sub> O <sub>4</sub>       | [M-H] <sup>-</sup>                                      | 181.05           | 147.7          |  |
|                                        | 16-Hydroxy hexadecanoic acid                 | C <sub>16</sub> H <sub>32</sub> O <sub>3</sub>      | [M-H] <sup>-</sup>                                      | 271.22           | 183.7          |  |
|                                        | Oxaloacetic acid                             | C <sub>4</sub> H <sub>4</sub> O <sub>5</sub>        | [M-H] <sup>-</sup>                                      | 131.06           | 118.3          |  |
|                                        | Ketoglutaric acid                            | C <sub>5</sub> H <sub>6</sub> O <sub>5</sub>        | [M-H] <sup>-</sup>                                      | 145.01           | 120.9          |  |
|                                        | Oxoazelaic acid                              | C <sub>9</sub> H <sub>14</sub> O <sub>5</sub>       | [M-H] <sup>-</sup>                                      | 201.08           | 133.3          |  |
|                                        | Malic acid                                   | C <sub>4</sub> H <sub>6</sub> O <sub>5</sub>        | [M-H] <sup>-</sup>                                      | 133.01           | 111.4          |  |
|                                        | Tartaric acid                                | C <sub>4</sub> H <sub>6</sub> O <sub>6</sub>        | [M-H] <sup>-</sup>                                      | 149.01           | 116.0          |  |
| Citric acid                            | C <sub>6</sub> H <sub>8</sub> O <sub>7</sub> | [M-H] <sup>-</sup>                                  | 191.02                                                  | 123.0            |                |  |
| Organic<br>Sulfate                     | Sodium Dodecyl sulfate                       | C <sub>12</sub> H <sub>25</sub> SO <sub>4</sub> Na  | [M-Na] <sup>-</sup>                                     | 265.15           | 163.6          |  |
|                                        | Sodium Taurocholate                          | C <sub>26</sub> H <sub>44</sub> SO <sub>7</sub> NNa | [M-Na] <sup>-</sup>                                     | 514.28           | 206.4          |  |

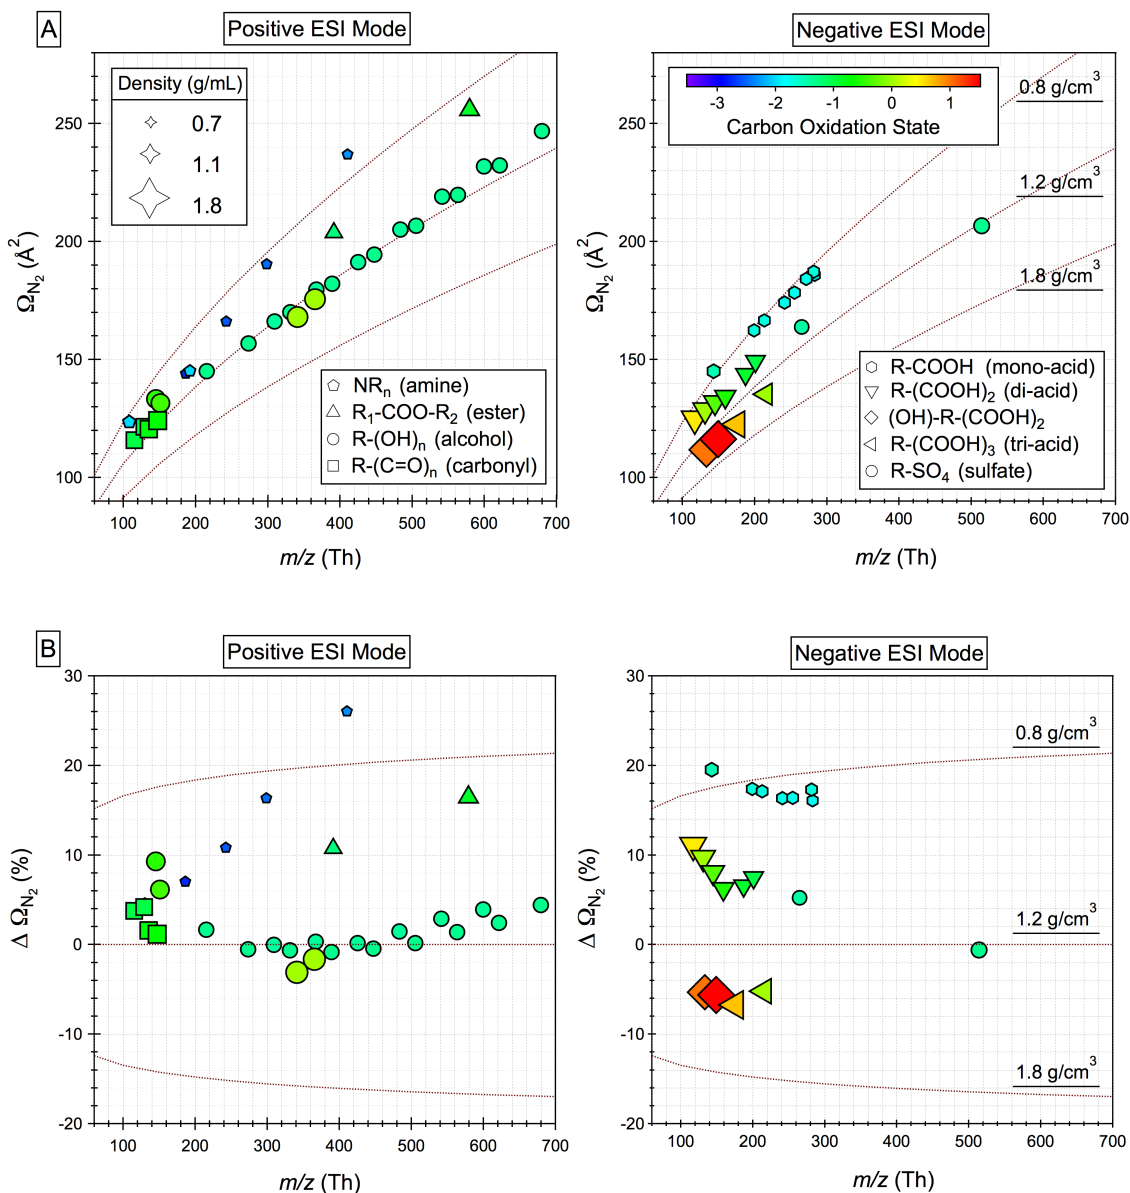

Figure 1. Distribution of organic species including alcohol ( $\text{R-(OH)}_n$ ,  $n = 2-8$ ), amine ( $\text{NR}_3$ ), *quaternary*-ammonium ( $\text{NR}_4$ ), carbonyl ( $\text{R-(C=O)}_n$ ,  $n = 1-2$ ), carboxylic acid ( $\text{R-(COOH)}_n$ ,  $n = 1-3$ ), ester ( $\text{R}_1\text{-COO-R}_2$ ), organic sulfate ( $\text{R-SO}_4$ ), and *multi*-functional compounds ( $(\text{OH})\text{-R-(COOH)}_2$ ) on the (A)  $\Omega_{N_2} - m/z$  space and (B)  $\Delta \Omega_{N_2} - m/z$  space. Note that species that are detected in different ion modes (+/-) are plotted separately.

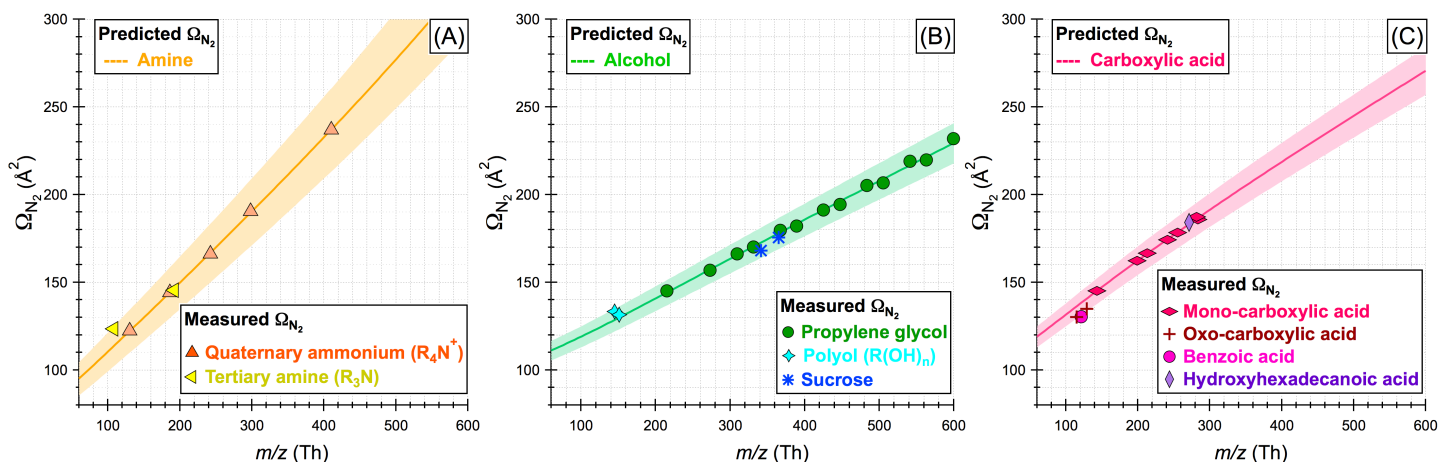

Figure 2. Measured collision cross sections ( $\Omega_{N_2}$ ) for (A) *tertiary*-amine and *quaternary*-ammonium, (B) (*di/poly/sugar*)-alcohol, and (C) (*mono/oxo/hydroxy*)-carboxylic acid as a function of the mass-to-charge ratio. Also shown are the predicted  $\Omega_{N_2} - m/z$  trend lines for amine, alcohol, and carboxylic acid by the core model. Here, *quaternary*-ammonium, propylene glycol, and  $C_8$ - $C_{18}$  *alkanoic*-acid are used to optimize the adjustable parameters in the core model (The markers are in the same color as the trend lines). The colored shade in each figure represents the maximum deviations (8.21%, 3.54%, and 6.69% for amine, alcohol, and carboxylic acid, respectively) of the predicted  $\Omega_{N_2}$  from the measured  $\Omega_{N_2}$  for species that are not used to constrain the core model. A single plot showing the separation of these three chemical classes is given in Figure S5 in the supplement.



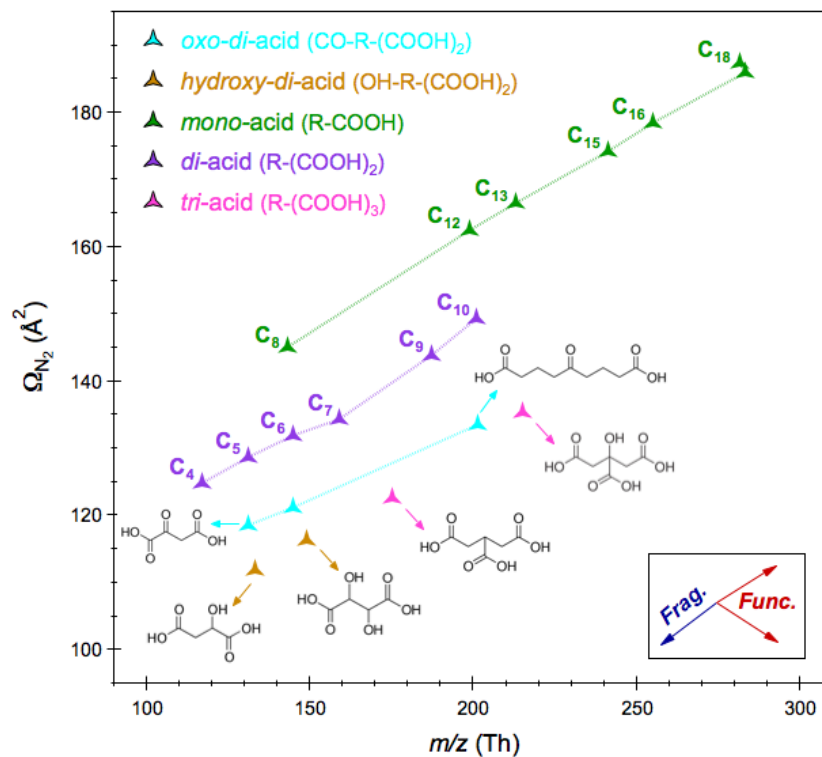

Figure 3. Trajectories associated with reactions involving functionalization (changes in the type and number of functional groups) and fragmentation (changes in the carbon chain length) through the 2-D  $\Omega_{N_2} - m/z$  space using carboxylic acid series as an illustration.

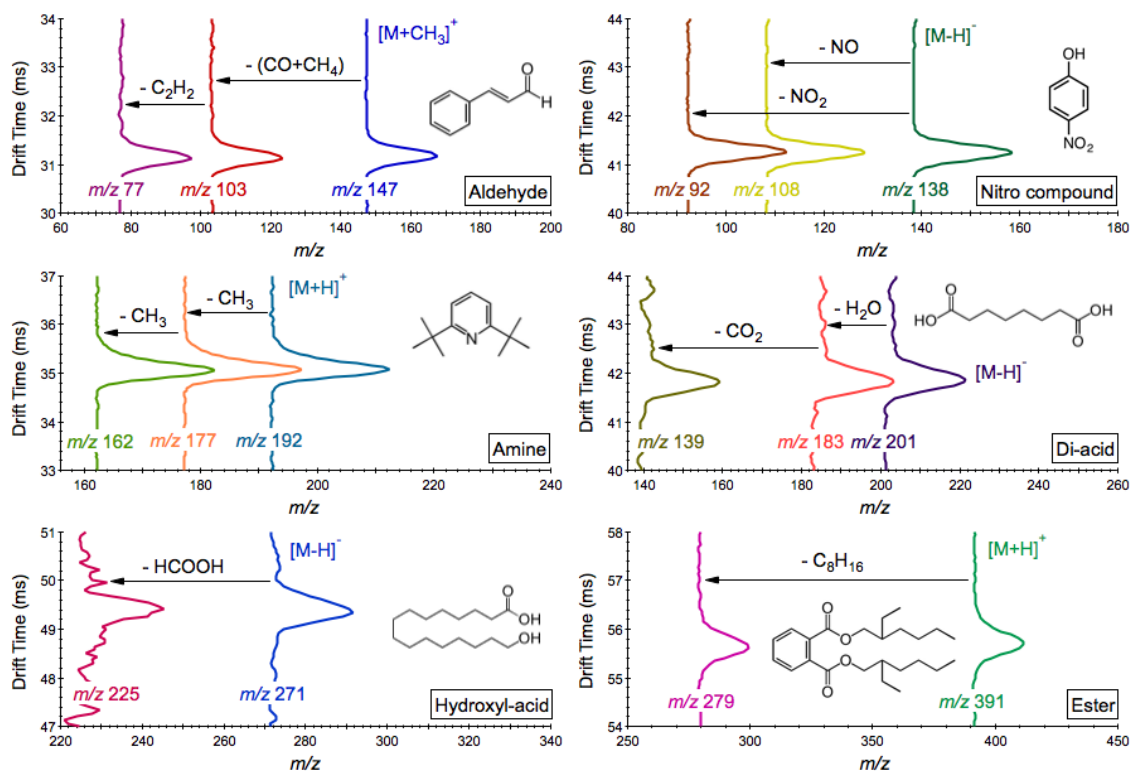

Figure 4. Collision induced dissociation patterns for molecular ions generated from cinnamaldehyde, dioctyl phthalate, 2,6-di-tert-butylpyridine, 4-nitrophenol, 16-hydroxyhexadecanoic acid, and sebacic acid on the 2-D framework with mass-to-charge ratio on the *x*-axis and drift time on the *y*-axis. The corresponding mobility selected MS spectra for each species is given in Figure S6 in the supplement.

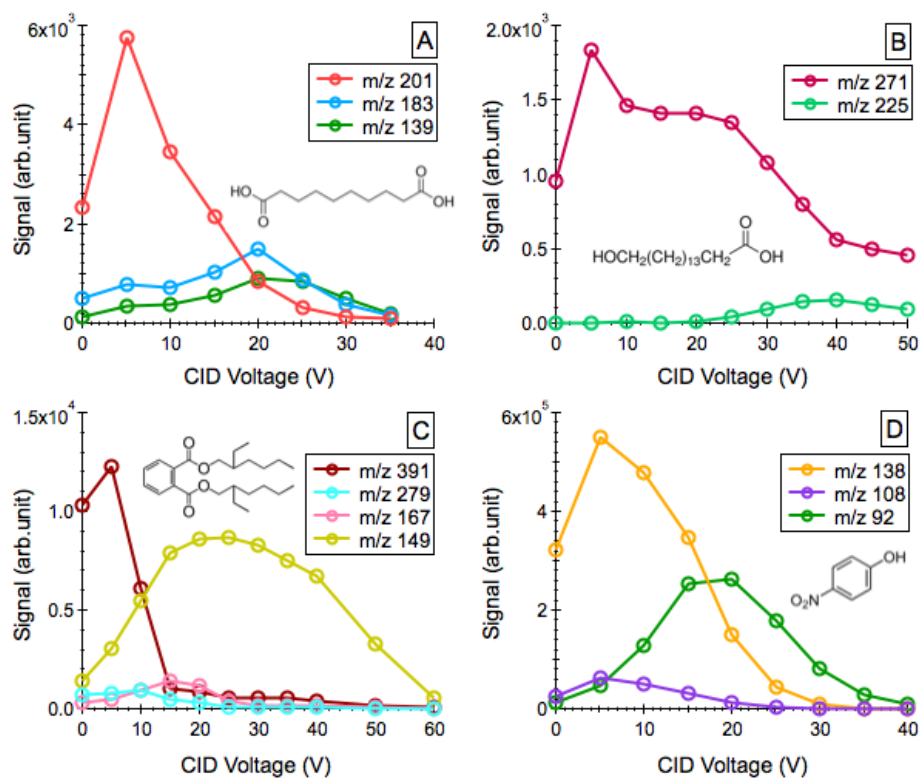

Figure 5. Product ion peak intensities as a function of collision voltage in the ‘mobility-selected’ MS spectra of (A) deprotonated sebacic acid, (B) deprotonated 16-hydroxyhexadecanoic acid, (C) sodiated dioctyl phthalate, and (D) deprotonated 4-nitrophenol.

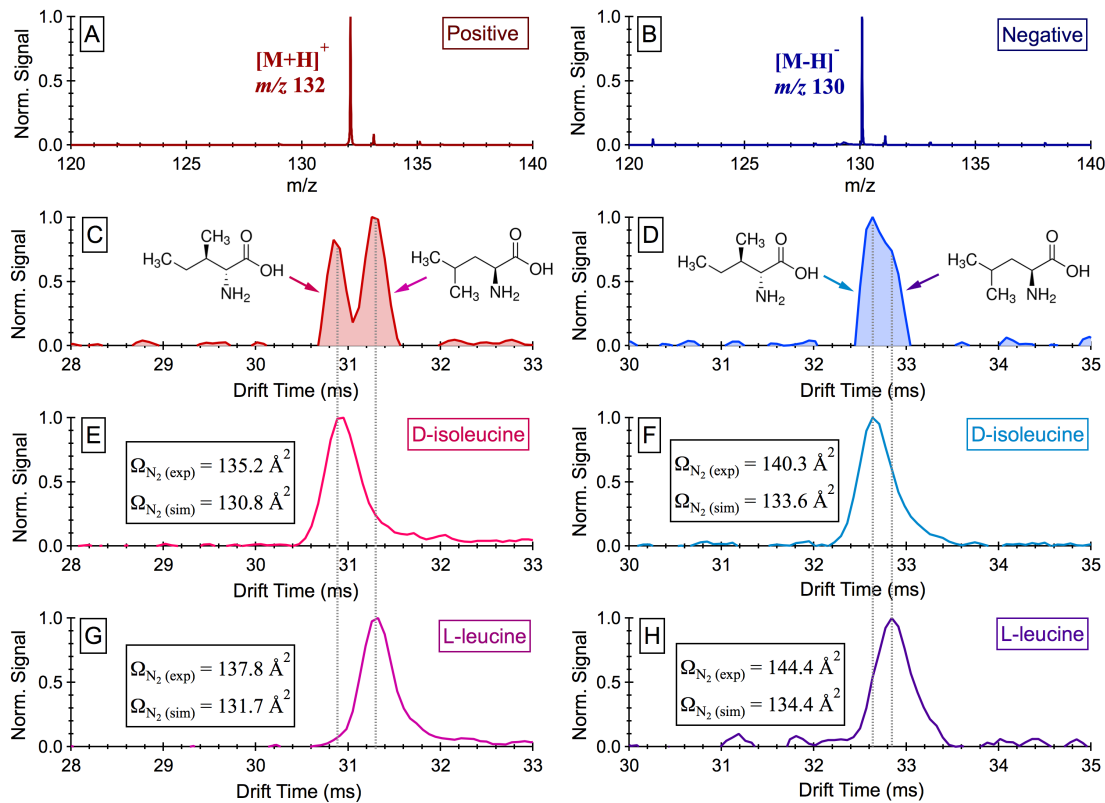

Figure 6. (A/B) ESI mass spectra collected for an equi-molar mixture (20  $\mu\text{M}$  each) of L-leucine and D-isoleucine in positive and negative mode. (C/D) Measured drift time distributions for the leucine mixture in positive and negative mode. (E/F) Measured vs. predicted  $\Omega_{N_2}$  for D-isoleucine, together with its drift time distributions in positive and negative mode. (G/H) Measured vs. predicted  $\Omega_{N_2}$  for L-leucine, together with its drift time distributions in positive and negative mode. Note that all measurements were performed at  $\sim 303 \text{ K}$  and  $\sim 1019 \text{ mbar}$  with an electric field strength of 414 and 403  $\text{V cm}^{-1}$  in the positive and negative mode, respectively.
